# Supplementary material for: FGFR1 SUMOylation coordinates endothelial angiogenic signaling in angiogenesis
Source: PubMed Central journal article supplement — Proc Natl Acad Sci U S A. 2022 Jun 21;119(26):e2202631119. doi: 10.1073/pnas.2202631119 (PMC9245619; doi:10.1073/pnas.2202631119), 2022-06-21
Supplement: pnas.2202631119.sapp.pdf [file pnas.2202631119.sapp.pdf]

## 1 **Supporting Information**

## 2 **Materials and Methods**

## 3 **Reagents and antibodies**

4 N-Ethylmaleimide (NEM), tamoxifen, cycloheximide, 5-bromodeoxyuridine (BrdU), heparin, 4,6-  
5 diamidino-2-phenylindole (DAPI) and crystal violet were purchased from Sigma (Sigma-Aldrich).  
6 Protein A and G sepharose were obtained from GE Health Care. Isolectin B4-AF594 was  
7 purchased from Invitrogen. Complete-protease-inhibitor cocktail tablets were obtained from  
8 Roche. Recombinant human VEGFA and recombinant human FGF2 were obtained from  
9 PeproTech. The growth medium and FBS used for cell culture were obtained from Gibco (Life  
10 Technologies). The EGM-2 complete medium kits for primary endothelial cells were obtained  
11 from Lonza.

12 The following antibodies were used for immunoblotting (IB), immunoprecipitation (IP), and  
13 immunofluorescence (IF) staining were anti-FGFR1 (Cell Signaling Technology (CST), 9740, IB  
14 1:2000, IP 1:200, and IF 1:100), anti-FLAG M2 (Sigma-Aldrich, A8592, IB 1:2000), anti-FLAG  
15 (CST, 8146, IF 1:200 and IP 1:200), anti-FLAG M2 magnetic beads (Sigma-Aldrich, M8823), anti-  
16 FRS2 $\alpha$  (Abcam, ab183492, IB 1:2000 and IP 1:100), anti-HA (Roche, 11867423001, IP 0.2  $\mu$ g  
17 per test), anti-HA (CST, 2999S, IB 1:1000), anti-Myc (Abmart, M20002, IB 1:3000), anti-actin  
18 (Sigma-Aldrich, A2228, IB 1:2000), anti-BrdU (Abcam, ab6326, IF 1:50), anti-PLC $\gamma$  (Sangon  
19 Company, D155196, IB 1:1000), anti-SEN1 (Abcam, Ab10898, IB 1:2000 and IF 1:100), anti-  
20 SUMO1 (CST, 4390, IB 1:1000), anti-ERG (CST, 97249, IF 1:100), anti-VEGFR2 (CST, 2479, IB  
21 1:2000), anti-VEGFR1 (CST, 2893, IB 1:1000), anti-p-FGFR1 (Tyr653/654) (CST, 3476, IB  
22 1:1000), anti-p-FRS2 $\alpha$  (Tyr436) (CST, 3861, IB 1:1000), anti-p-PLC $\gamma$  (Tyr783) (CST, 2821, IB  
23 1:1000), anti-p-ERK1/2 (Thr202/Tyr204) (CST, 9101, IB 1:2000), anti-p-VEGFR2 (Tyr1054/1059)  
24 (CST, 3817, IB 1:2000 and IF 1:50). Horseradish peroxidase-linked anti-rabbit IgG secondary  
25 antibody (Jackson ImmunoResearch, #711-035-152, 1:10,000), anti-mouse IgG secondary  
26 antibody (Jackson ImmunoResearch, #715-035-151, 1:10,000) and anti-goat IgG secondary  
27 antibody (Jackson ImmunoResearch, #705-035-147, 1:10,000) were used for IB. Alexa Fluor  
28 594-conjugated donkey anti-rabbit IgG (Jackson ImmunoResearch, #711-586-152, 1:200), Alexa  
29 Fluor 594-conjugated donkey anti-rat IgG (Jackson ImmunoResearch, #712-586-150, 1:200) and  
30 Alexa Fluor 488-conjugated donkey anti-goat IgG (Jackson ImmunoResearch, #705-545-147,  
31 1:200) were used for IF staining, and DAPI was used to stain nuclei.

## 32 **Cell lines and culture conditions**

33 All the cell lines were cultured in a humidified 37°C incubator with 5% CO<sub>2</sub>. HEK293T cells and  
34 COS-7 cells were cultured in Dulbecco's modified Eagle's medium (DMEM, Gibco 11965084)  
35 with 10% fetal bovine serum (FBS, Gibco) and 100 U/ml penicillin/streptomycin (Gibco  
36 15140122). Human microvascular endothelial cells (HMVECs) and human umbilical vein  
37 endothelial cells (HUVECs) were purchased from Lonza and maintained in EBM-2 (Lonza)  
38 supplemented with 2% FBS, 2 mM L-glutamine, 100 U/ml penicillin/streptomycin and EGM-2  
39 bullet kits. Primary mouse lung endothelial cells (MLECs) from 8-week-old mice were isolated and  
40 cultured in complete EGM-2 growth medium. The cells were maintained at 30%–90% confluence  
41 and were subcultured using 0.05% trypsin-EDTA (Gibco 25300120) for dissociation. Cellular  
42 stress conditions were induced by treatment with VEGFA at 10 ng/ml or FGF2 at 100 ng/ml in the  
43 presence of 20 U/ml heparin for the indicated time points after serum free starvation for 4 h.  
44 Hypoxia was induced by transferring cells into a hypoxic incubator containing 1% O<sub>2</sub>, 5% CO<sub>2</sub>

45 and 94% N2 and incubating them for 12 h. All experimental primary endothelial cells were used  
46 through passage 7.

#### 47 **Plasmids and transfection**

48 The expression plasmid for Flag-tagged FGFR1-WT was obtained from YouBio (G114229). All  
49 FGFR1 mutations were generated by site-directed mutagenesis in which Lys 517 and Lys 714  
50 were changed to Arg residues and were verified by DNA sequencing. A SUMO-1 fusion plasmid  
51 was constructed similarly to that generated for expressing SUMOylated proteins(31, 35). Briefly,  
52 the PCR-amplified SUMO1 fragment (without a double glycine-encoding sequence at the C-  
53 terminal) was subcloned into a pXF6F vector plasmid using restriction sites BglII and NotI. Then,  
54 PCR-amplified human FGFR1 cDNA was subcloned into the restriction sites XhoI and XbaI in the  
55 C-terminal domain of the SUMO1 fragment. Expression plasmids for HA-SUMO1, Myc-SENP1-  
56 WT, Myc-SENP1-CA mutant (SENP1-Mut), HA-SENP1-WT, HA-SENP2-WT, HA-SENP5-WT,  
57 and VEGFR2 were thus constructed in our laboratory. HA-Frs2 $\alpha$ -full-length was obtained from  
58 YouBio (G111928), and HA-Frs2 $\alpha$ -PTB and HA-Frs2 $\alpha$ - $\Delta$ PTB were constructed based on this  
59 vector. The PTB domain consists of amino acids 18-110, while HA-Frs2 $\alpha$ - $\Delta$ PTB consists of amino  
60 acids 1-17 and 111-508. HA-PTPRG was obtained from YouBio (G156730).

61 293T or COS-7 cells were seeded into 6-well plates the day before transfection and cultured until  
62 they reached 50-70% confluence, and then, they were transfected. Plasmids transfection was  
63 performed using Lipofectamine 2000 (Life Technologies) according to the manufacturer's  
64 protocol. Cells were treated and harvested for protein assays or immunofluorescence staining 24  
65 to 48 h after transfection.

#### 66 **siRNA transfection**

67 Endothelial cells were seeded into 6-well plates or 100-mm dishes 16 h prior to transfection and  
68 allowed to grow to 50-70% confluence and then were transfected. siRNAs or scrambled siRNA  
69 were transfected using Lipofectamine RNA iMAX according to the manufacturer's instructions  
70 (Life Technologies) in reduced serum medium Opti-MEM (Life Technologies). Cells were  
71 transfected with siRNAs for 72 h before cellular stress treatment. The sequences of the siRNAs  
72 were SENP1, 5'-GUGAACCACAACUCCGUUUUUCTT-3'; FGFR1, 5'-  
73 CAAUUGCCCUUCCAGUGGGTT-3'; PTPRG, 5'-GCUAAUACCACUCGAAUAUTT-3'; and  
74 negative control, 5'-UUCUCCGAACGUGUCACGUTT-3'.

#### 75 **Adenovirus infection**

76 Several adenoviruses were generated (Ad-SENP1-WT, Ad-SENP1-CA, Ad-Flag-FGFR1-WT, Ad-  
77 Flag-FGFR1-2KR, and Ad-Flag-FGFR1-SUMO1) to overexpress SENP1, the SENP1 CA mutant,  
78 FGFR1-WT, the FGFR1-2KR mutant, and Flag-FGFR1-SUMO1 in endothelial cells. Adenoviral  
79 vectors containing SENP1-WT, SENP1-CA mutant, Flag-FGFR1-WT, Flag- FGFR1-2KR mutant,  
80 and Flag-FGFR1-SUMO1 were generated by inserting the corresponding cDNA into a  
81 multicloning site in the adenovirus backbone of plasmid pHBAD. The constructs were  
82 cotransfected with shuttle vectors into 293 cells for adenovirus packaging and amplification and  
83 then purified (Hanbio Biotech Company, Shanghai, China). endothelial cells were first transfected  
84 with SENP1 siRNA or FGFR1 siRNA to knockdown the endogenous expression of SENP1 or  
85 FGFR1 before they were transduced with Ad-SENP1, Ad-SENP1-CA, Ad-Flag-FGFR1-WT, or  
86 Ad-Flag-FGFR1-2KR. Twenty-four hours after siRNA transfection, the cells were infected with  
87 various adenoviruses at an MOI of 30-50 in Opti-MEM (Gibco) and incubated for 4 h. Then, the

88 cells were maintained in EGM-2 complete culture medium for an additional 48 h before assays  
89 were performed.

### 90 **Cell lysates and cell fractionation**

91 Cells were washed with ice-cold PBS and lysed in Triton lysis buffer (50 mM Tris-HCL, pH 7.5;  
92 150 mM NaCl; 1 mM EDTA; 1 mM EGTA; and 0.1% (v/v) Triton X-100); and 1x protease inhibitor  
93 cocktail) for 20 min on ice and centrifuged (14,000 rpm for 10 min at 4°C). Then, 5x/2x SDS  
94 sample buffer (250 mM Tris, 5%/2% SDS, 50% glycerol and 500 mM/200 mM DTT) was added to  
95 the lysate to a final concentration of 1x. After heating for 5 min at 100°C, samples were placed in  
96 ice and cooled for use. Cell fractionation was conducted using a subcellular protein fractionation  
97 kit (Pierce) according to the manufacturer's instructions.

### 98 **Immunoblotting**

99 Cellular proteins or IP samples were analyzed directly by electrophoresis. Lysates or  
100 immunoprecipitates were run on SDS-PAGE gels (8%/10%/12%) and transferred to  
101 polyvinylidene fluoride membranes (Bio-Rad Laboratories). The membranes were blocked with  
102 5% skim milk and TBST for 1 h at room temperature, briefly rinsed with TBST and then incubated  
103 overnight with primary antibody at 4°C. After washing, the membranes were incubated with  
104 secondary antibody for 1 h at room temperature and then washed again three times. Finally,  
105 chemiluminescence was detected using ECL reagents.

### 106 **Protein stability assay**

107 The stability of FGFR1-WT and FGFR1-2KR was determined by cycloheximide (CHX) treatment.  
108 In brief, plasmids encoding Flag-tagged FGFR1 or the FGFR1-2KR mutant were transfected into  
109 293T cells, incubated 24 h and treated with 10 µM CHX treatment at the indicated time points.  
110 The cell lysate was harvested at the indicated time point and subjected to immunoblotting  
111 analysis. Flag-FGFR1-WT and Flag-FGFR1-2KR were measured with actin used as an internal  
112 control.

### 113 **Quantitative real-time PCR**

114 Total RNA was harvested according to the instructions of a kit (Omega). After quantification, 500  
115 ng of RNA was reverse transcribed to cDNA according to the protocol of a reverse transcription  
116 kit (TaKaRa) followed by quantitative real-time PCR on an iCycler real-time PCR detection  
117 system (Bio-Rad). GAPDH was used as an internal control. The sequences of the primers (5'-3')  
118 were

119 PTPRG, forward TTCGTGTGCCTCATCCTTCT and reverse TCGAGGTGAACTGCTGTCTT and

120 GAPDH, forward CATTGCCCTCAACGACCACTTTGT and reverse:  
121 TCTCTCTTCTCTTGTGCTCTTGC.

### 122 **Immunofluorescence staining**

123 The subcellular localization of FGFR1-WT and FGFR1-2KR was determined by  
124 immunofluorescence staining. COS-7 cells transfected with 1 µg of Flag-FGFR1-WT or 1 µg of  
125 Flag-FGFR1-2KR were washed with PBS, fixed in 4% PFA for 10 min at room temperature,  
126 blocked with blocking buffer (PBS with 5% (v/v) goat FBS and 1% (w/v) BSA) for 1 h at room  
127 temperature, and incubated overnight with primary antibody at 4°C. Secondary antibody  
128 conjugated with Alexa Fluor 488 was incubated for 1 h at room temperature, and nuclei were  
129 stained with DAPI. All sections were mounted and imaged using a confocal microscope (Zeiss,  
130 AxioVert 200 M).

131 **MLEC isolation**

132 Lungs from FGFR1-WT<sup>ecK1</sup> and FGFR1-2KR<sup>ecK1</sup> mice were harvested, minced, and digested with  
133 prewarmed 0.1% collagenase in PBS containing Ca<sup>2+</sup> and Mg<sup>2+</sup> for 1 h at 37°C. The digest was  
134 homogenized by passing it 15 times through a 16-gauge needle and was then filtered through a  
135 70- $\mu$ m tissue sieve into a 50-ml tube. After centrifugation, the digest was resuspended in growth  
136 medium (EGM-2 full medium) and then seeded on 0.1% gelatin-coated tissue culture dishes.  
137 After 3 to 4 days of culture in growth medium, endothelial cells were isolated by magnetic beads  
138 (IgG Dynal beads from Dynal Corp., Great Neck, NY) preconjugated with anti-ICAM-2 antibody  
139 and separated by a magnetic separator. A second sorting process was performed after 4-5 days  
140 of culture. The cells immunoselected twice were used for subsequent experiments.

141

142 **Supplemental Figures**

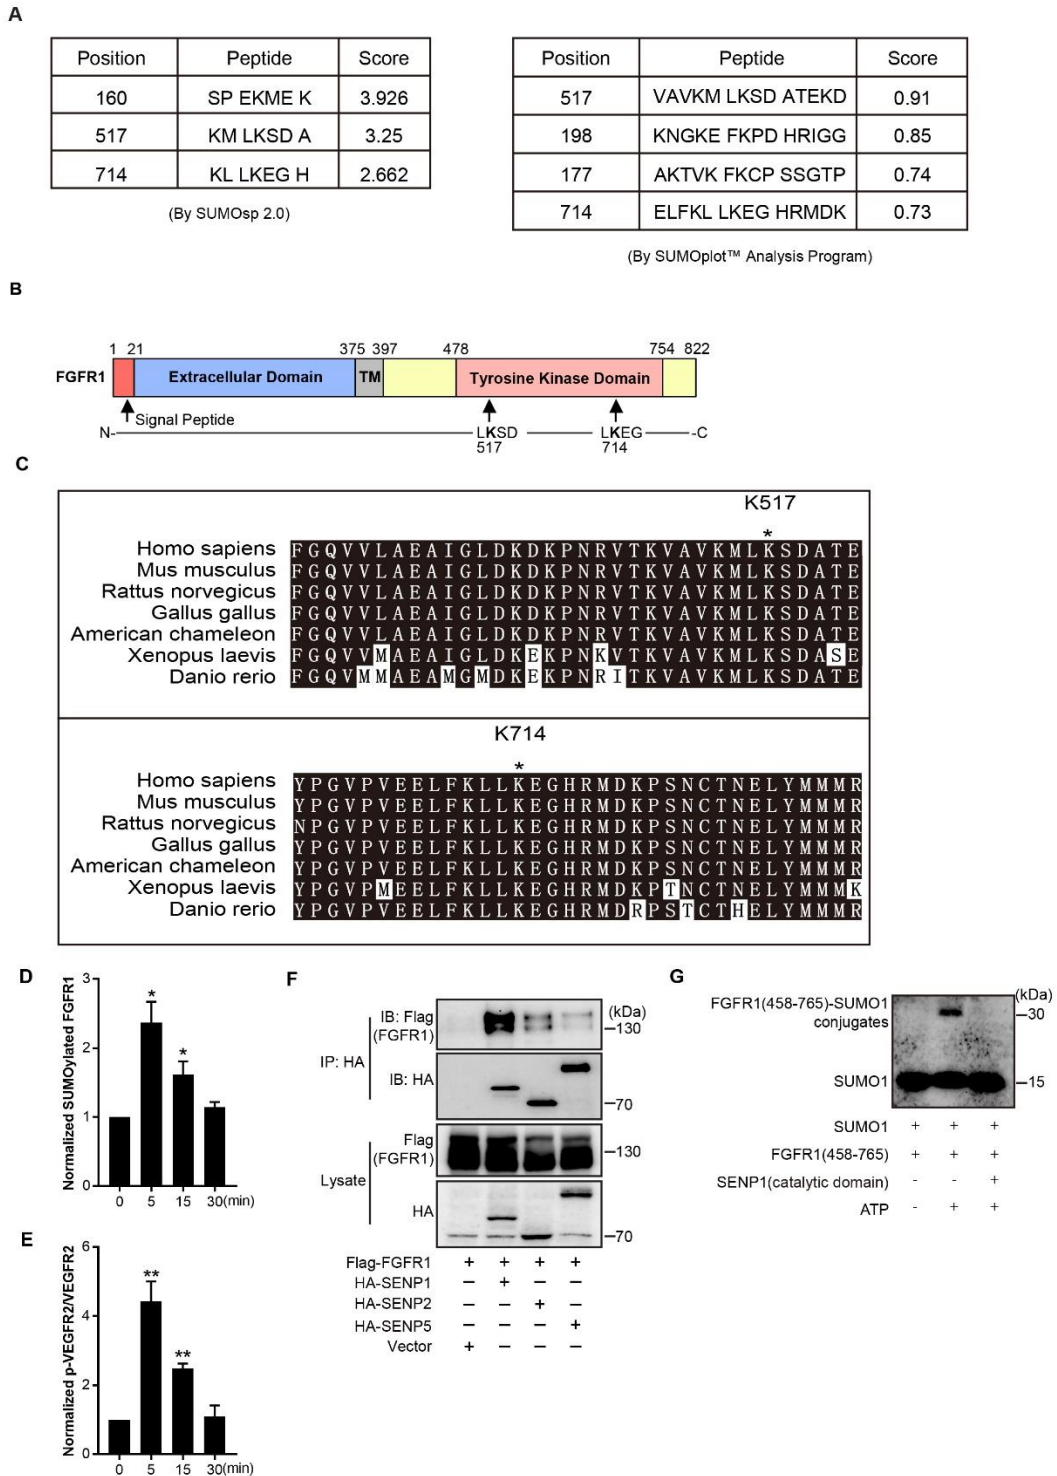

143  
144  
145  
146

**Figure. S1. The prediction and conservation of SUMOylation sites in the FGFR1 protein and the interaction between FGFR1 and SENP proteins. A** The putative SUMOylation sites in FGFR1 were determined by SUMOsp2.0 software and SUMOplot™ Analysis Program online

147 tools. Two lysine residues (lysine 517 and lysine 714) were consistent in the results. **B** Mapped  
148 domains of the FGFR1 protein and the relevant position of lysine 517 and lysine 714 residues. **C**  
149 Alignment of orthologous FGFR1 amino acid sequences in *Homo sapiens*, *Mus musculus*, *Rattus*  
150 *norvegicus*, *Gallus gallus*, American chameleon, *Xenopus laevis*, and *Danio rerio* demonstrates  
151 evolutionary conservation of SUMOylation sites in FGFR1. **D-E** Quantification of FGFR1  
152 SUMOylation and VEGFR2 phosphorylation for Fig. 1F. The relative SUMOylated FGFR1 and p-  
153 VEGFR2/VEGFR2 are presented as mean  $\pm$  SEM (n=3). \*, p $\leq$ 0.05; \*\*, p $\leq$ 0.01. **F** Representative  
154 blot showing the association between FGFR1 and SENP proteins. Flag-FGFR1 plasmids were  
155 co-transfected with HA-vector, HA-SENP1, HA-SENP2, or SENP5. HA (SENP) was  
156 immunoprecipitated followed by immunoblotting using anti-Flag (FGFR1) antibody. **G** FGFR1  
157 SUMOylation was de-SUMOylated by recombinant SENP1 in an *in vitro* SUMOylation assay. The  
158 assay was performed using a SUMOylation assay kit as described in the “Materials and Methods”  
159 section. The reaction mixture was subjected to immunoblotting with anti-SUMO1 antibody as  
160 indicated.

161

162

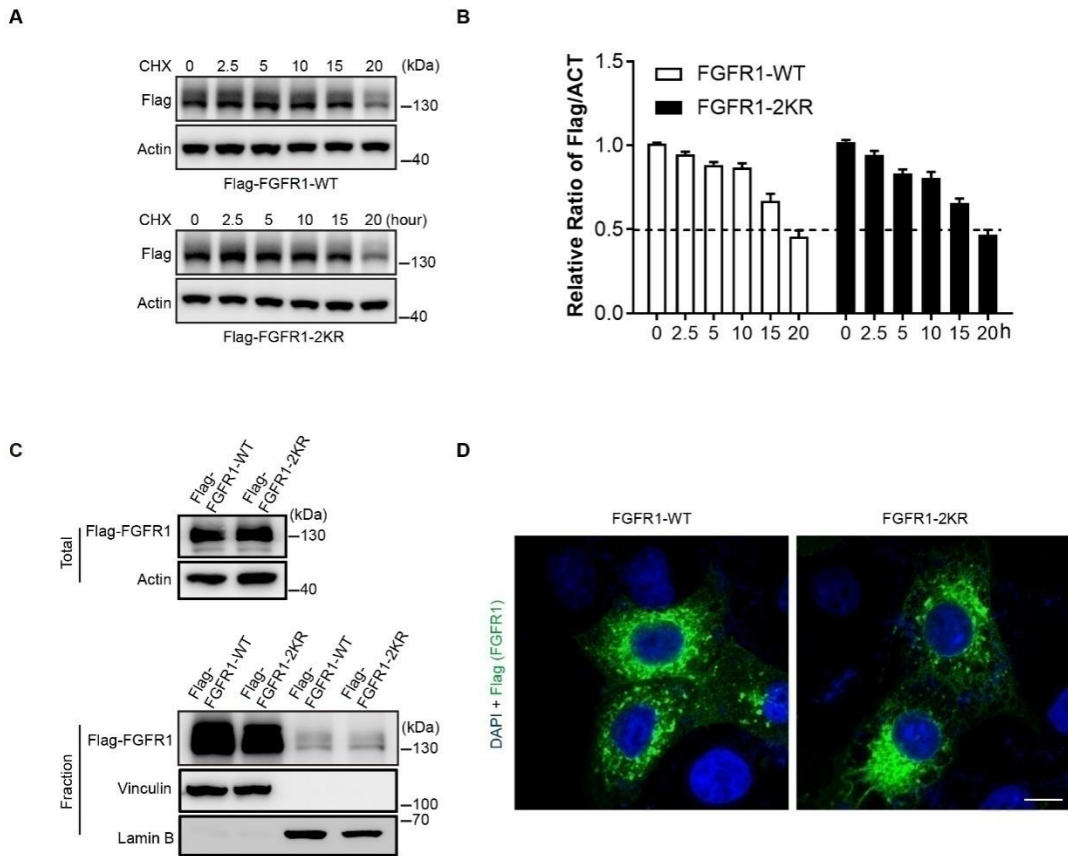

163  
 164  
 165  
 166  
 167  
 168  
 169  
 170  
 171  
 172

**Figure. S2. The protein stability and intracellular localization of FGFR1-WT and the FGFR1-2KR mutant.** **A-B** Half-life test of FGFR1-WT and FGFR1-2KR. 293T cells were transfected with Flag-FGFR1-WT or Flag-FGFR1-2KR mutant plasmids followed by cycloheximide (CHX, 10  $\mu$ g/ml) at the indicated time points. The expression of Flag-FGFR1-WT or Flag-FGFR1-2KR was determined by anti-Flag antibody. The blots are shown in **(A)**, and the quantification of the relative protein levels are presented as mean  $\pm$  SEM ( $n=3$ ) in **(B)**. **C-D** Distribution of FGFR1-WT and FGFR1-2KR. The expression of FGFR1-WT and FGFR1-2KR in the cytoplasm and nucleus was detected by anti-Flag antibody after cell fractionation **(C)** or immunofluorescence staining using an anti-Flag antibody **(D)**. The nuclei were stained with DAPI. The bar represents 25  $\mu$ m.

173

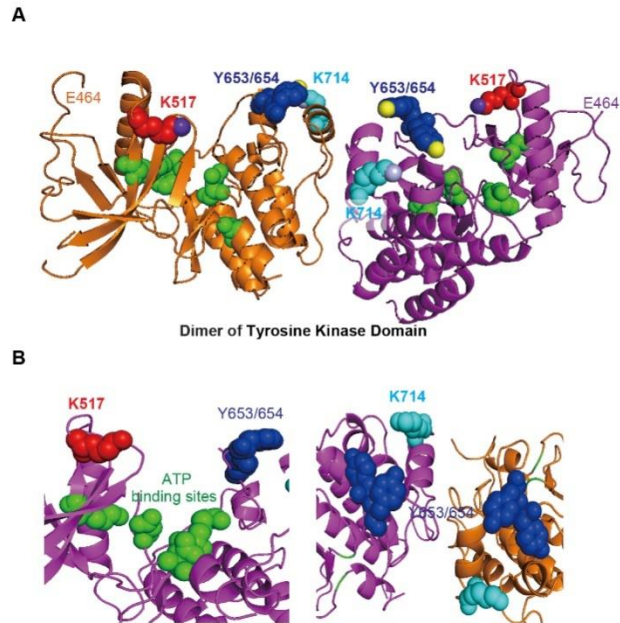

174  
 175  
 176  
 177  
 178  
 179  
 180  
 181  
 182  
 183  
 184  
 185

**Figure. S3. Lysine 517/714 in the FGFR1 tyrosine kinase domain.** The crystal structure of the dimerized human FGFR1 tyrosine kinase domain (1AGW in the PDB database) was displayed by PyMOL software 1.5.0.3. **A** Two putative SUMO1 binding site residues, K517 (red) and K714 (light blue) reside in the core autophosphorylation region of the FGFR1 tyrosine kinase domain and are present on the surface of each subunit. **B** The details of the structure around K517 and K714 demonstrate that the K517 residue is located close to an ATP-binding pocket, which contains more than 5 ATP-binding sites, providing the phosphate group for the FGFR1 protein, and the K714 residue is located near the dimer interface of juxtaposed tyrosine kinase domains and close to the core tyrosine residues Tyr653/654, which are essential for the catalytic activity and signal transduction of FGFR1.



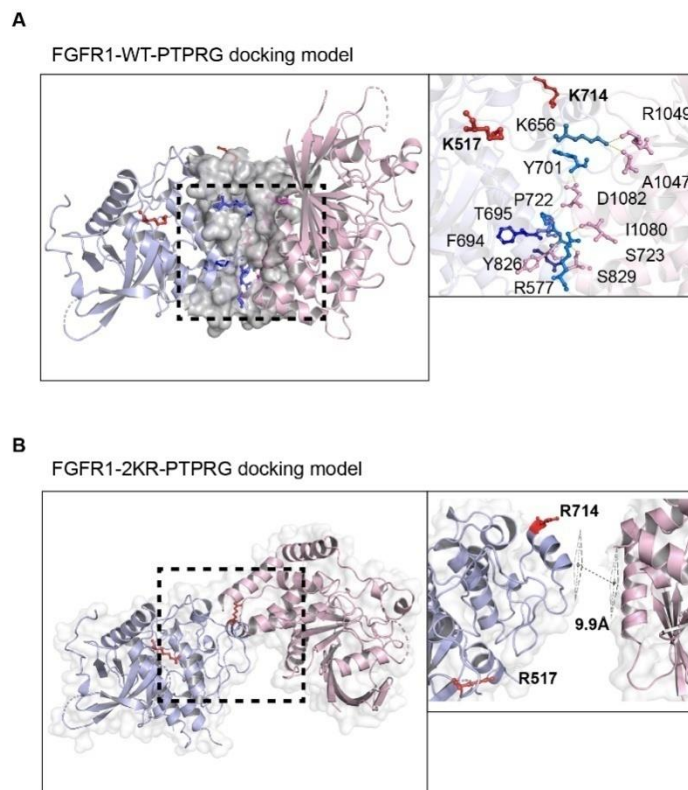

186  
187  
188  
189  
190  
191  
192  
193  
194  
195  
196  
197  
198  
199  
200  
201  
202  
203

**Figure. S4. The conformational changes triggered by deSUMOylation of FGFR1 restrain its interacting and docking capabilities with PTPRG.** The molecular docking of FGFR1-WT and FGFR1-2KR tyrosine kinase domains with the PTPRG tyrosine-protein phosphatase domain was assessed by GrammX and Z-DOCK algorithms. The distances (Å) and docking interface between FGFR1-WT/FGFR1-2KR and PTPRG were measured and performed by PyMOL 2.3.0 open-source software. The 3D structures of FGFR1-WT and FGFR1-2KR (general view and at specific residues) are labeled in light blue in (A-B); the PTPRG (general view and at specific residues) are labeled in light pink in (A-B); the interacting residues of the docking interface are indicated by the black dashed boxes in the left panels of (A-B), which are enlarged in the right panels of (A-B); the SUMOylated/deSUMOylated residues (K517/R517, K714/R714) are labeled in red, the residues of FGFR1 in the docking interface are labeled in blue, the residues of PTPRG in the docking interface are labeled in pink; the molecular binding force of the hydrogen bonds is indicated as yellow dashed lines in the right panels in (A-B). Compared to FGFR1-WT, FGFR1-2KR interacts with much lower binding affinity for PTPRG. Hydrogen bonds are the molecular binding forces of FGFR1-WT with PTPRG, with interacting residue distances less than 3 Å, whereas the distance between FGFR1-2KR and PTPRG at the docking interface is 9.9 Å.

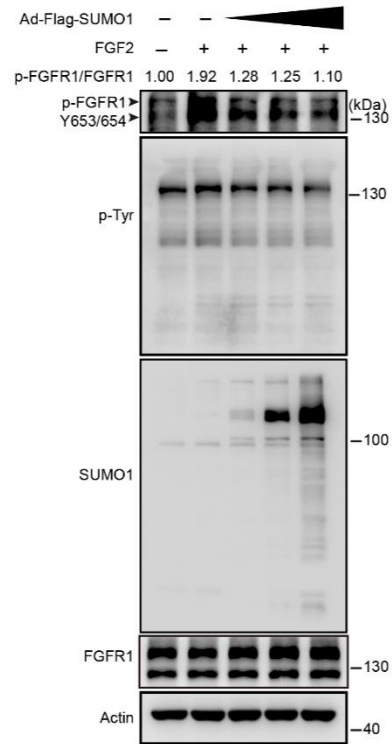

204

205 **Figure. S5. Phosphorylation of FGFR1 (Y653/654) is suppressed in endothelial cells**  
 206 **following an increase in SUMOylation.** Representative blot showing p-FGFR1 (Y653/654) and  
 207 p-Tyr. Ad-GFP or Ad-Flag-SUMO1 was transduced into endothelial cells followed by FGF2  
 208 stimulation for 5 min after serum free starvation. Arrowhead indicates band of interest.

209

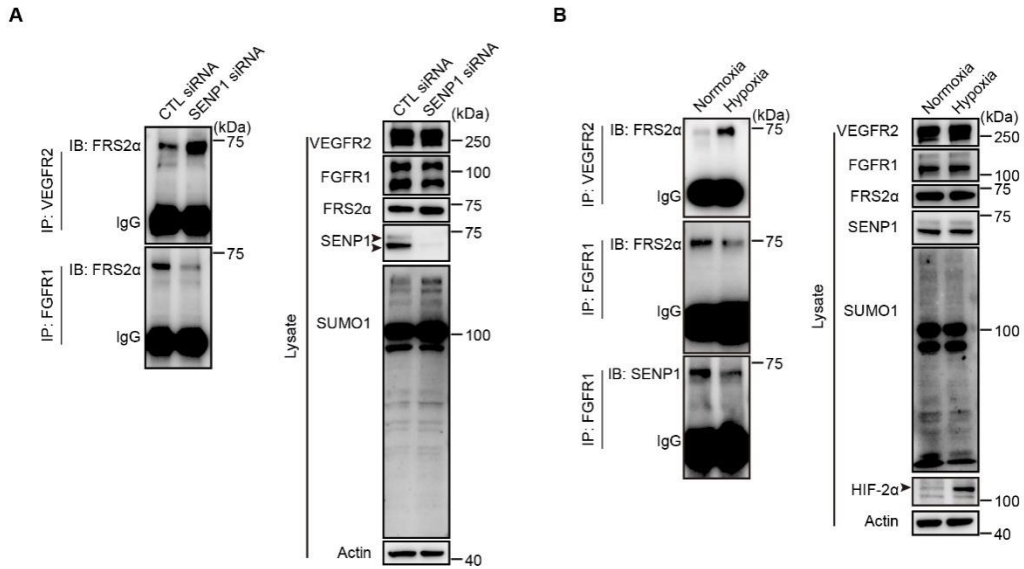

210

211 **Figure. S6. SENP1 knockdown or hypoxia enhances VEGFR2-FRS2α association but**  
 212 **inhibits FGFR1-FRS2α association in endothelial cells.** Representative blots of FRS2α that  
 213 co-immunoprecipitates with FGFR1 and VEGFR2 upon control siRNA/SENP1 siRNA treatment  
 214 (A) or normoxia/hypoxia treatment (B) in HMVECs with 16h starvation. Arrowhead indicates band  
 215 of interest.

216

217

218

219

220

221

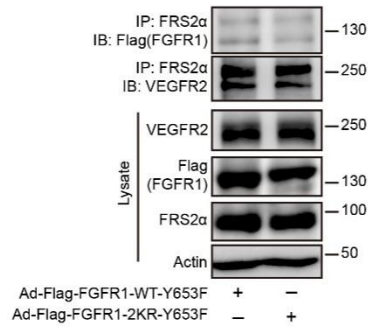

222

223 **Figure. S7. Y653/654 inactivation in FGFR1 eliminates the differences in the binding of**  
 224 **FGFR1-WT or FGFR1-2KR with FRS2α and in corresponding VEGFR2-FRS2α association.**  
 225 FRS2α was immunoprecipitated followed by immunoblotting for FGFR1(Flag) and VEGFR2 in  
 226 HMVECs transduced with adenoviral-delivered FGFR1-WT-Y653F (Ad-Flag-FGFR1-WT-Y653F)  
 227 or FGFR1-2KR-Y653F (Ad-Flag-FGFR1-2KR-Y653F) mutants. Representative blots of binding of  
 228 FRS2α to FGFR1 or VEGFR2 are shown.

229

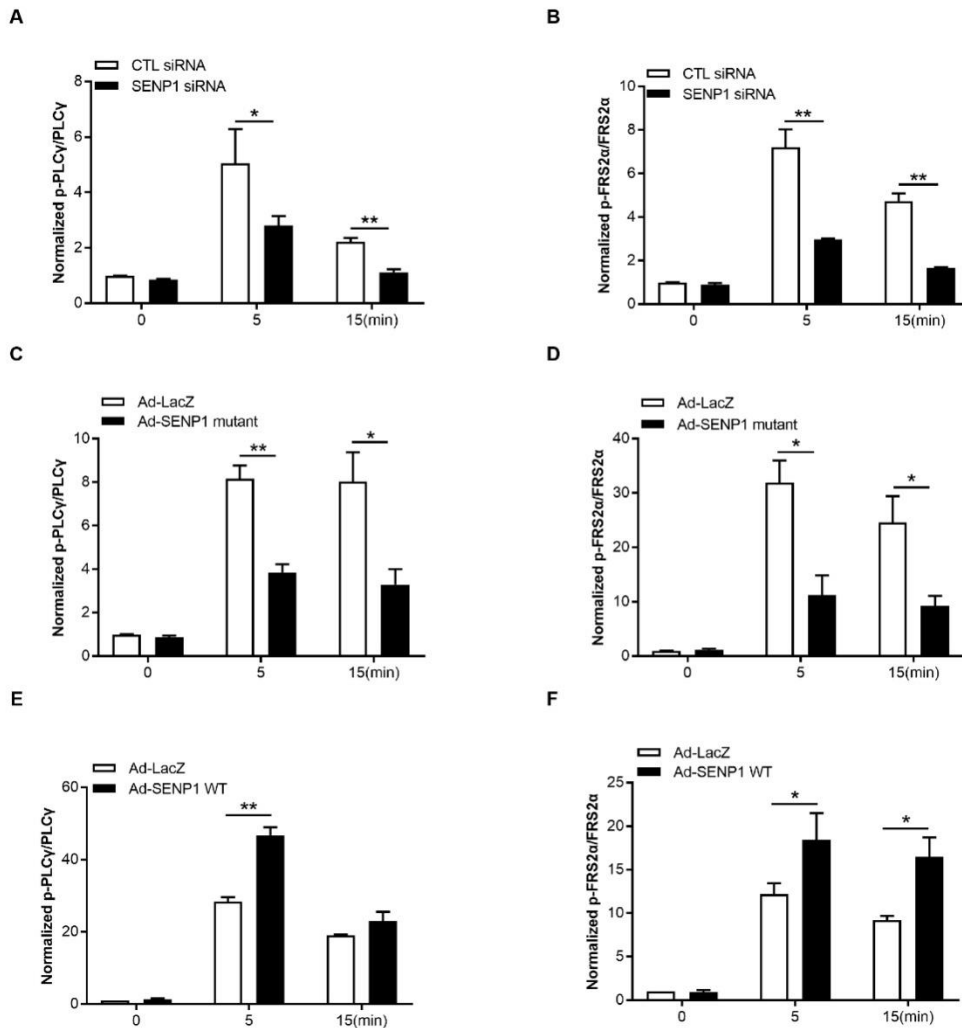

230

231 **Figure. S8. Quantification of FGFR1 downstream signaling activation in endothelial cells**  
 232 **with SENP1 knockdown or WT/mutant overexpression.** FGF2 induced PLC $\gamma$  phosphorylation and  
 233 FRS2 $\alpha$  phosphorylation in control/SENP1 siRNA treated HMVECs (A-B), Ad-LacZ/Ad-  
 234 SENP1 mut treated HMVECs (C-D), and Ad-LacZ/Ad-SENP1 WT treated HMVECs (E-F) at  
 235 indicated time points were quantified, respectively. Normalized value is presented as mean  $\pm$   
 236 SEM from three independent experiments. \*,  $p \leq 0.05$ ; \*\*,  $p \leq 0.01$ .

237

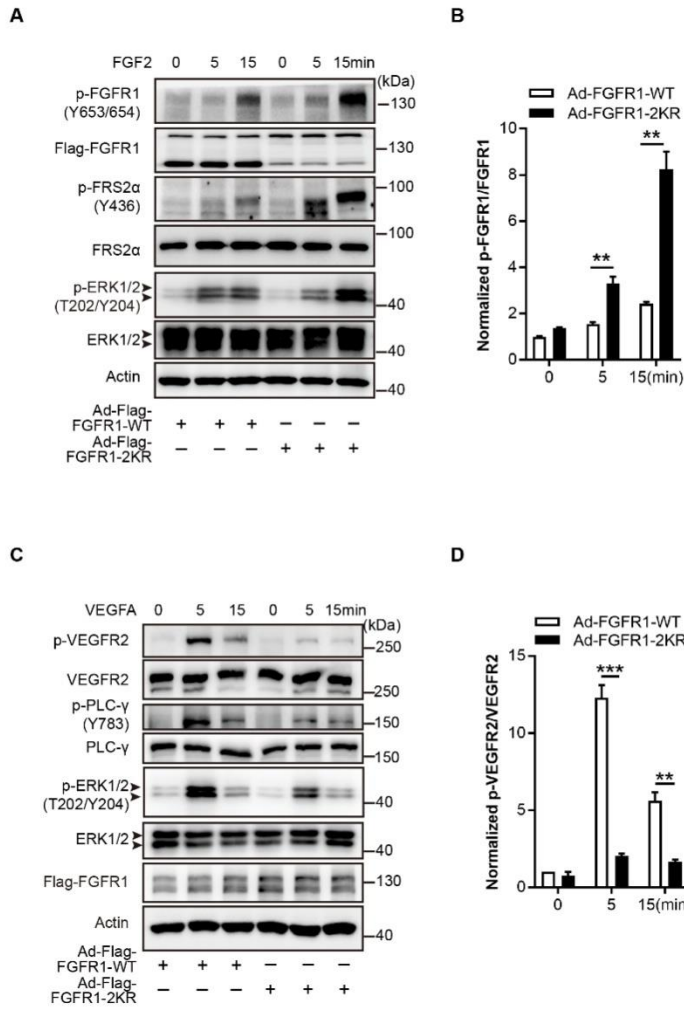

238

239 **Figure. S9. FGF2-FGFR1 signaling and VEGFA-VEGFR2 signaling in HUVECs expressing**  
 240 **FGFR1-WT or the FGFR1-2KR mutant. A-B** FGF2-FGFR1 signaling in HUVECs infected with  
 241 Ad-FGFR1-WT or the Ad-FGFR1-2KR mutant after FGF2 stimulation at the indicated time points.  
 242 Representative blots are shown in **A** with quantification of p-FGFR1/FGFR1 in **B**. Arrowhead  
 243 indicates band of interest. **C-D** VEGFA-VEGFR2 signaling in HUVECs infected with Ad-FGFR1-  
 244 WT or the Ad-FGFR1-2KR after VEGFA stimulation at the indicated time points. Representative  
 245 blots are shown in **C** with quantification of p-VEGFR2/VEGFR2 ratio in **D**. Arrowhead indicates  
 246 band of interest. The normalized amount in **B** and **D** are presented as mean  $\pm$  SEM (n=3). \*\*,  
 247 p $\leq$ 0.01; \*\*\*, p $\leq$ 0.001.

248

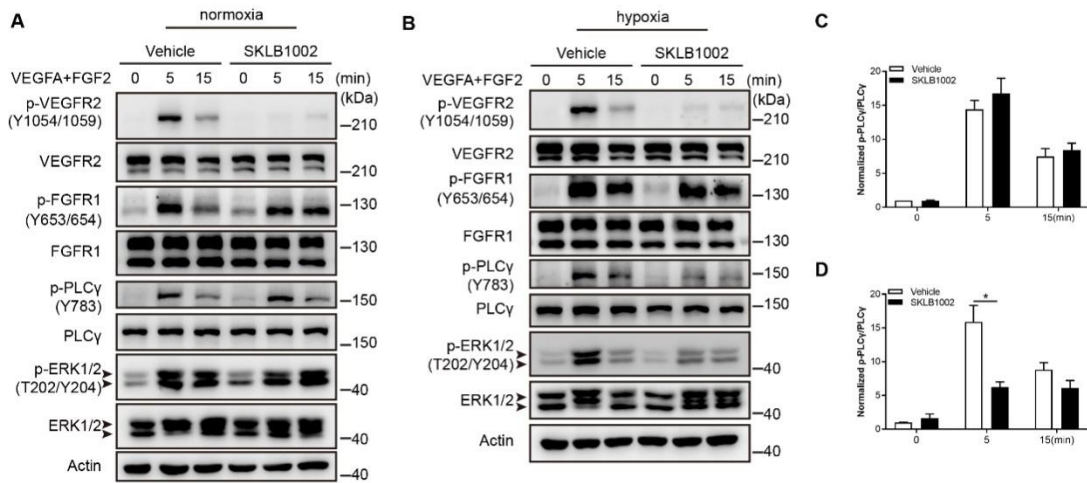

249

250 **Figure. S10. The activation of FGF2-FGFR1 signaling and VEGFA-VEGFR2 signaling in**  
 251 **endothelial cells with SKLB1002 treatment under normoxia and hypoxia. (A, C)** FGF2-  
 252 FGF1 signaling and VEGFA-VEGFR2 signaling in HMVECs treated with vehicle or SKLB1002  
 253 (VEGFR2 signaling inhibitor) under normoxia. Representative blots are shown in **A** with  
 254 quantification of PLCγ phosphorylation in **C**. **(B, D)** FGF2-FGFR1 signaling and VEGFA-VEGFR2  
 255 signaling in HMVECs treated with vehicle or SKLB1002 under hypoxia. Representative blots are  
 256 shown in **B** with quantification of PLCγ phosphorylation in **D**. The quantification data are  
 257 presented as the mean ± SEM (n=3), \*, p<0.05. Arrowhead indicates band of interest.

258

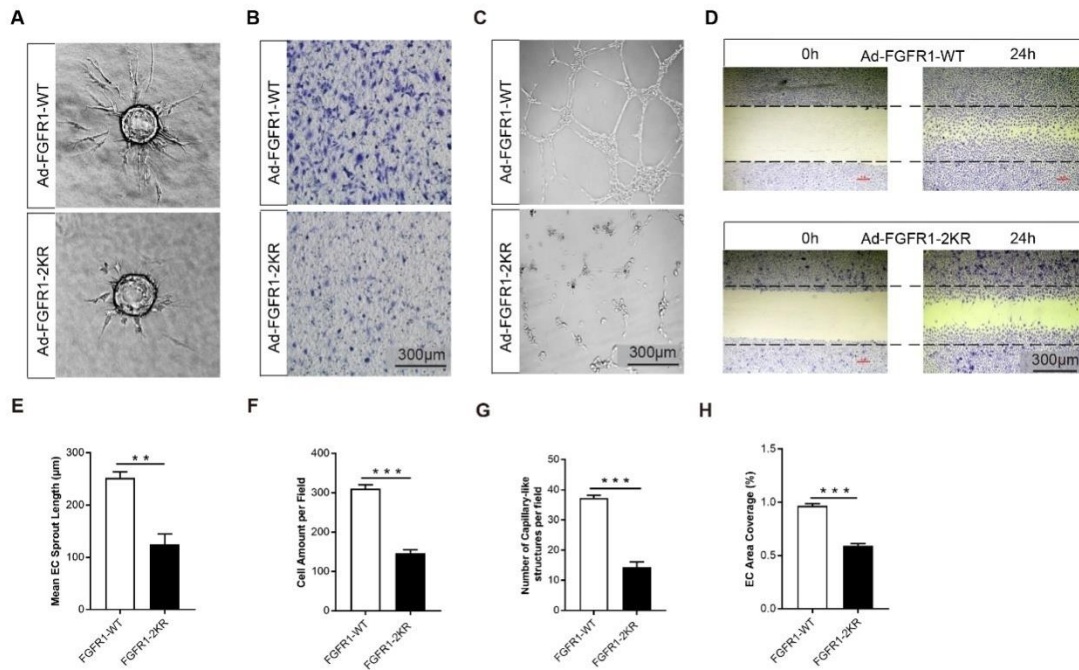

259

260 **Figure. S11. The angiogenic capabilities of endothelial cells bearing the FGFR1-2KR**  
 261 **mutant are blocked.** HUVECs infected with Ad-FGFR1-WT or the Ad-FGFR1-2KR mutant were  
 262 evaluated for proangiogenic capabilities. Representative images of sprouting, transmigration,  
 263 capillary-like structure formation, and wound healing are shown in **A-D**. The quantification of EC  
 264 sprout length, number of migrated cells, number of capillary-like structures, and EC area  
 265 coverage are shown in **E-H**. All experiments were performed in triplicate, and significance was  
 266 determined by unpaired t-test. The data are presented as the mean  $\pm$  SEM from at least three  
 267 independent experiments, where \*\*,  $p \leq 0.01$  and \*\*\*,  $p \leq 0.001$ . The bar represents 300  $\mu\text{m}$ .

268



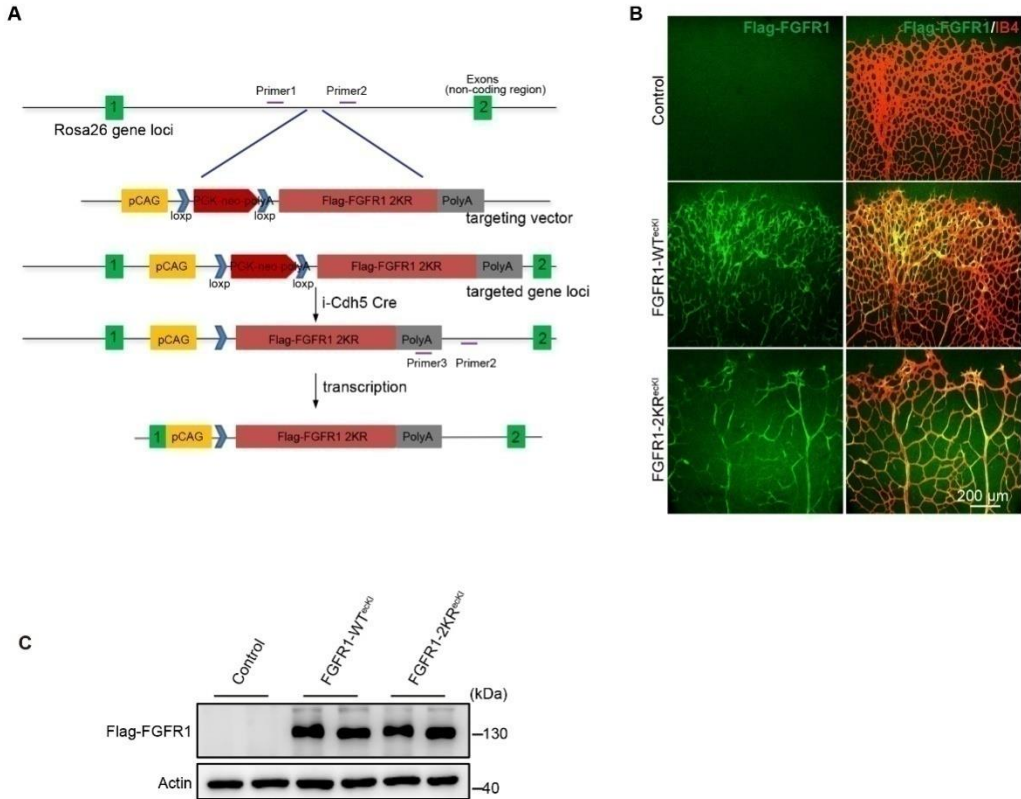

269  
 270 **Figure. S12. Construction of inducible endothelial FGFR1-WT/FGFR1-2KR mutant knock-in**  
 271 **mice.** **A** construction strategy. The cDNA-encoding Flag-tagged FGFR1 wild-type (FGFR1-WT)  
 272 protein coding sequence was inserted downstream of a loxP-flanking transcriptional stopper  
 273 cassette (PGK-neo-polyA). This fragment was targeted to a constitutively transcribing ROSA26  
 274 locus to generate FGFR1-WT ROSA26 knock-in mice, which were bred with Cdh5-CreERT2  
 275 (iCdh5 Cre) mice to obtain inducible endothelial-cell-specific FGFR1-WT (FGFR1-WT<sup>ecK1</sup>)  
 276 expression upon tamoxifen injection. The same strategy was employed for the construction of  
 277 tamoxifen-inducible endothelial cell-specific expression of the FGFR1 2KR mutant (FGFR1-  
 278 2KR<sup>ecK1</sup>). **B** Tamoxifen induced the expression of FGFR1-WT (Flag) (green) and FGFR1-2KR  
 279 (Flag) (green) in vasculature stained by IB4-594 in whole-mount P7 retinas from the control (n=3)  
 280 or FGFR1-WT<sup>ecK1</sup> (n=4) or FGFR1-2KR<sup>ecK1</sup> mice (n=3). The bar represents 200  $\mu$ m. **C** Protein  
 281 levels of FGFR1-WT and FGFR1-2KR. After intraperitoneal injection of tamoxifen, primary  
 282 endothelial cells were isolated from the lung tissue of transgenic mice, and the protein levels of  
 283 FGFR1-WT (Flag) and FGFR1-2KR (Flag) were detected by anti-Flag antibody.

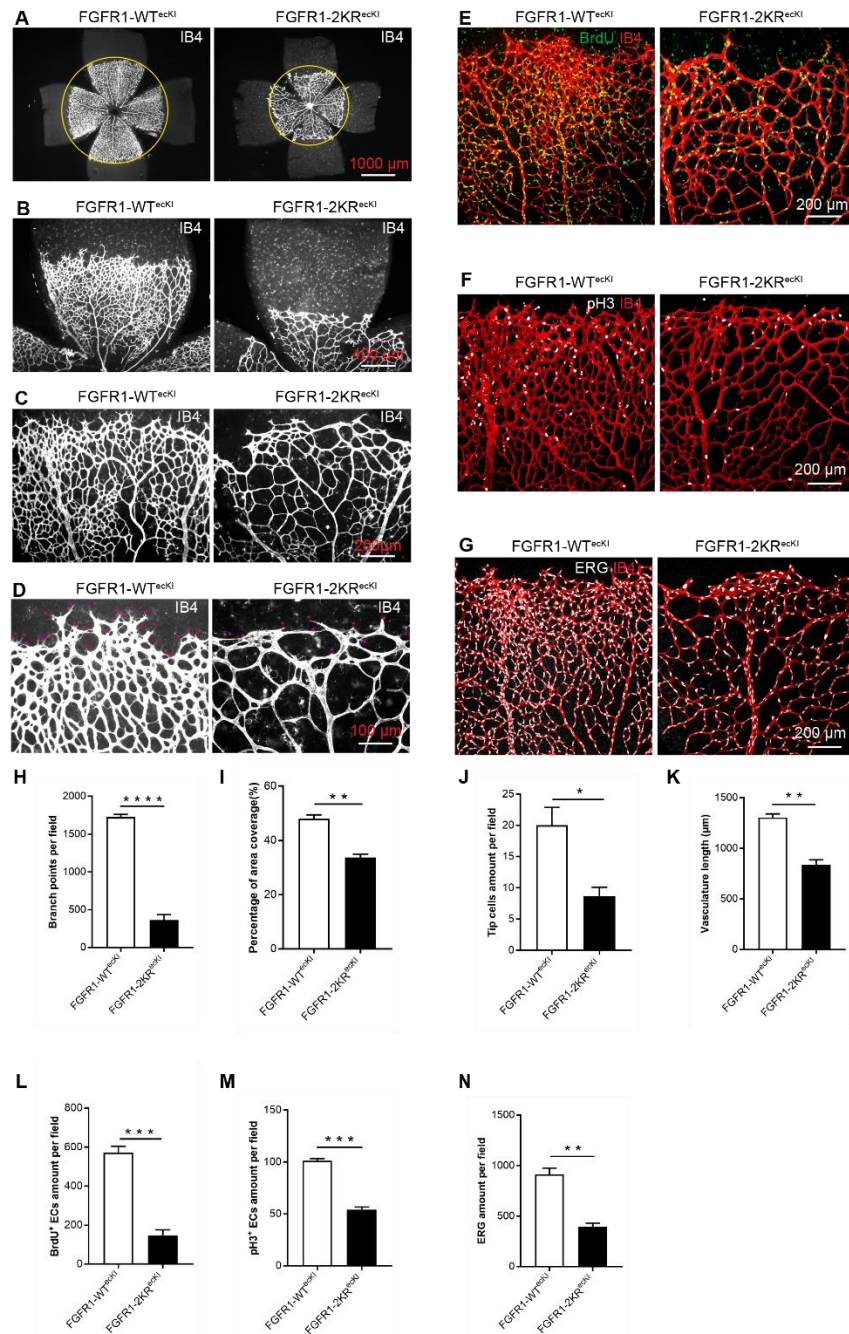

285  
286  
287  
288  
289  
290  
291  
292  
293

**Figure. S13. Neonatal retina angiogenesis and proliferation analysis in P5 FGFR1-WT<sup>ecKl</sup>- and FGFR1-2KR<sup>ecKl</sup>-expressing pups.** **A-D** Whole-mount P5 retinas from FGFR1-WT<sup>ecKl</sup>- or FGFR1-2KR<sup>ecKl</sup>- expressing mice. Representative images of P5 vascular outgrowth in FGFR1-WT<sup>ecKl</sup> control (n=10) and FGFR1-2KR<sup>ecKl</sup> retinas (n=12) stained with IB4 are shown. Red asterisks in **D** indicate tip cells. **E-G** Proliferation test of endothelial cells in the P5 FGFR1-WT<sup>ecKl</sup> (n≥4 for all assays) and P5 FGFR1-2KR<sup>ecKl</sup> (n≥4 for all assays) retinal vasculature. BrdU (**E**) and phospho-histone H3 (**F**) staining intensities were analyzed to determine the proliferation capability of endothelial cells in the FGFR1-WT<sup>ecKl</sup>- and FGFR1-2KR<sup>ecKl</sup>-expressing pups. ERG (**G**) staining

294 intensity was measured to indicate the number of endothelial cells in the retinal vasculature. **H-N**  
295 Quantification of all the experiments above. All experiments were performed in triplicate, and  
296 significance was determined by unpaired t-test. The data are presented as the mean  $\pm$  SEM,  
297 where \*,  $p \leq 0.05$ , \*\*,  $p \leq 0.01$ , \*\*\*,  $p \leq 0.001$ , \*\*\*\*,  $p \leq 0.0001$ .

298

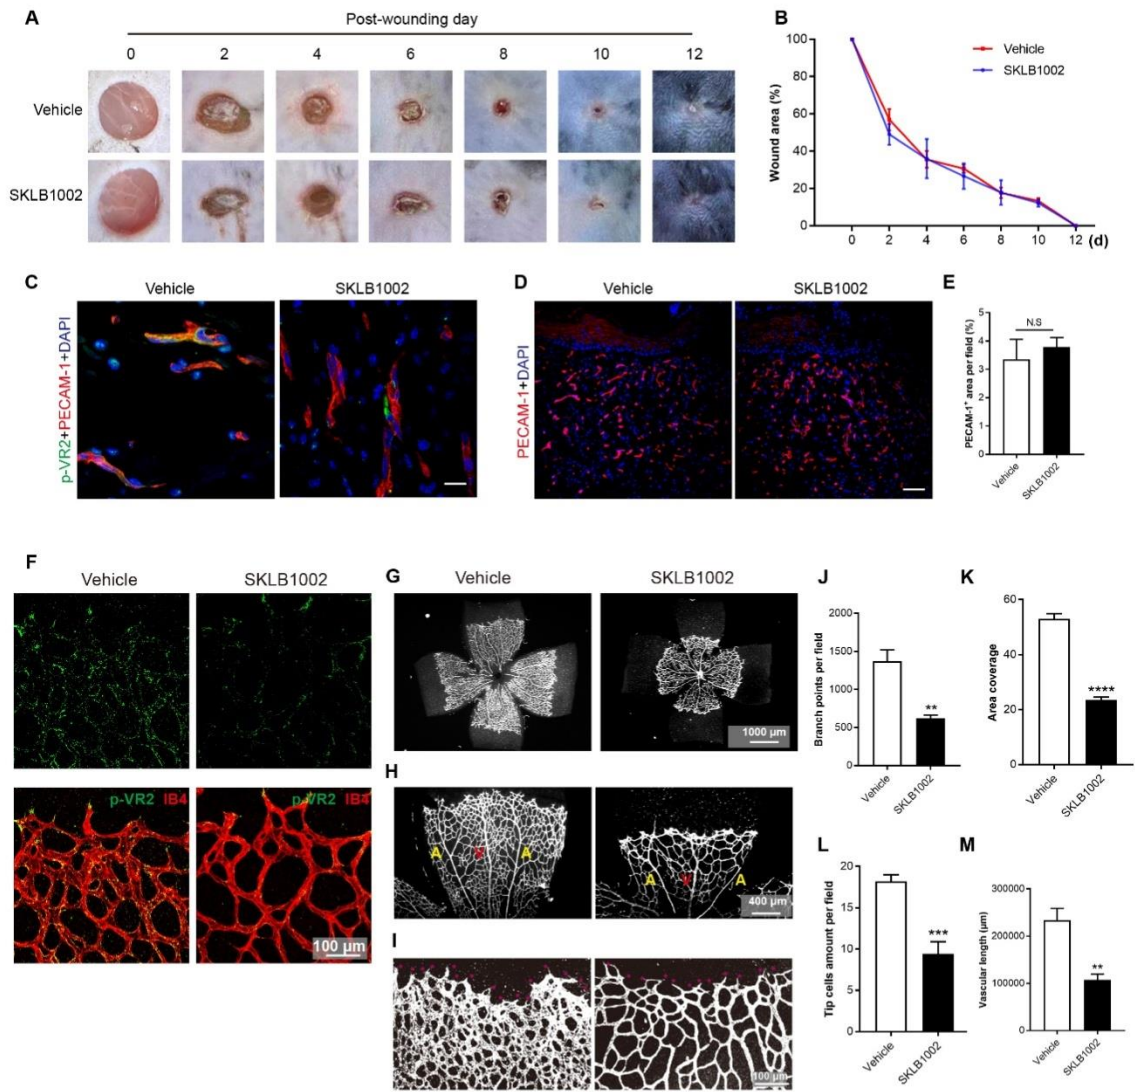

299

300  
301

**Figure. S14. The VEGFR2 signaling inhibitor does not affect wound angiogenesis but suppresses neonatal retinal angiogenesis in mice, suggesting the critical role of FGFR1**

302 **signaling in pathological angiogenesis under normoxia and VEGFR2 signaling in hypoxic**  
303 **angiogenesis. (A-B)** Skin wound healing of mice treated with vehicle (n=5) or SKLB1002  
304 (VEGFR2 signaling inhibitor) (n=5). Representative images of skin wound from day 0 to day 12  
305 after wound injury are shown in **A** with quantification of wound area in **B**. Data are shown as  
306 mean  $\pm$  SEM. Significance was determined by two-way ANOVA followed by Bonferroni's multiple  
307 comparisons test. **(C)** Representative images of immunofluorescence staining for p-VEGFR2  
308 (green) and endothelial marker PECAM-1 (red) in skin section from mice treated with vehicle or  
309 SKLB1002. DAPI was used to indicate nuclear. Bar represents 50  $\mu$ m. **(D)** Representative  
310 PECAM-1 labeled vessels (red) in wound edge of vehicle or SKLB1002-treated mice 6 days after  
311 excision wound injury. Nuclei is stained by DAPI (blue). Bar represents 200  $\mu$ m. **(E)** Quantitative  
312 immunofluorescence of PECAM-1 positive area (vessel area) per field in **D**. Comparison was  
313 performed by t-test. N.S = non significance. **(F)** Representative images showing p-VEGFR2  
314 (green) in the vehicle and SKLB1002 treated retinal vasculature with IB4 staining in red. **(G-I)**  
315 Representative images showing P5 vascular outgrowth in vehicle control (n=5) or SKLB1002  
316 treated mouse retinas (n=5) stained with IB4. "A" in **H** indicates artery, while "V" indicates vein.  
317 Red asterisks in **I** indicate tip cells. **(J-M)** The quantification data of the branch points, area  
318 coverage, tip cell amounts, and vasculature length are presented as the mean  $\pm$  SEM (n=5).  
319 Significance was determined by an unpaired t-test. \*\*,  $p \leq 0.01$ ; \*\*\*,  $p \leq 0.001$ ; \*\*\*\*,  $p \leq 0.0001$ .

320

321
